# Supplementary material
Source: PubMed Central journal article supplement (PMC8986035)
Supplement: 7311_3_supp_92819_r01b1m.pdf [file 7311_3_supp_92819_r01b1m.pdf]

## Supplemental Material

Quantitative super-resolution microscopy reveals promoting mitochondrial interconnectivity  
protects against AKI

Kensei Taguchi et al.

Supplemental Material Table of Contents:

Legends of Supplemental Figures

Supplemental Figure 1

Supplemental Figure 2

Supplemental Table

**Supplemental Figure 1. SRRF and SoRa imaging can resolve tubule cell mitochondria and be used for quantitative analysis of mitochondrial volume.** **A.** Schematic representation of the process of mounting tissue to coverslips. **B.** SRRF imaging of uninjured mouse kidney tissue. Nikon TiE, 100x objective, Andor IXon with SRRF, 1024x1024, processed to 4096x4096. **C.** Comparison of the original widefield image to the SRRF processed image using line scans. Note the increased resolution of the peaks following SRRF processing. **D.** Uninjured tubule cells imaged with SoRa, top panels, and quantitative data, bottom panel. Scale bar=10 $\mu$ m. **E.** Low magnification EM micrograph of the area chose for serial sectioning in Figure 2.

**Supplemental Figure 2. Tissue SIM can resolve cardiomyocyte mitochondria and quantify mitochondrial surface area alterations with injury.** **A.** SIM can image cardiac muscle cell mitochondria. Hearts were collected from db/m or db/db mice at 6 months of age and fixed, stained and imaged using the same protocol used for kidney. Scale bar = 5 $\mu$ m. **B.** Quantification of maximum mitochondrial network area and total mitochondrial surface area from A. n = 5.

**Supplemental Video 1:** Video showing a full 3D rotation of the single mitochondrion imaged by SIM in Figure 2C.

**Supplemental Video 2:** Video showing a full 3D rotation of the single mitochondrion imaged by in Figure 2G.

# Supplemental Figure 1

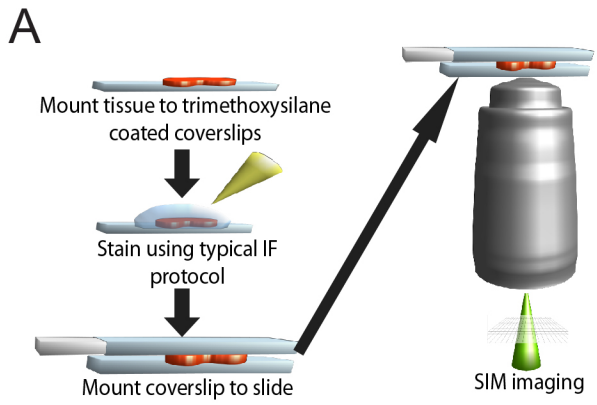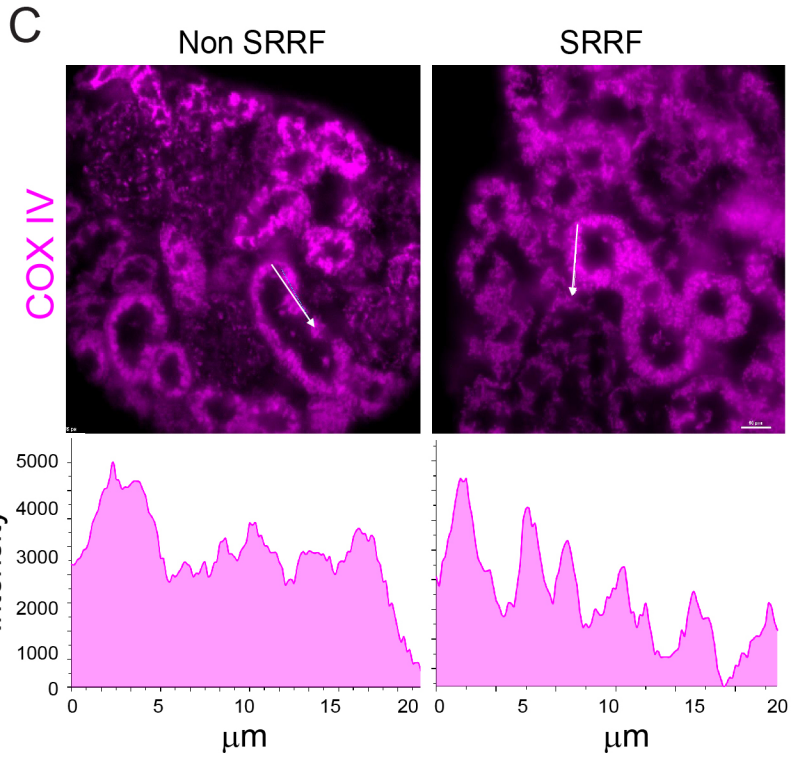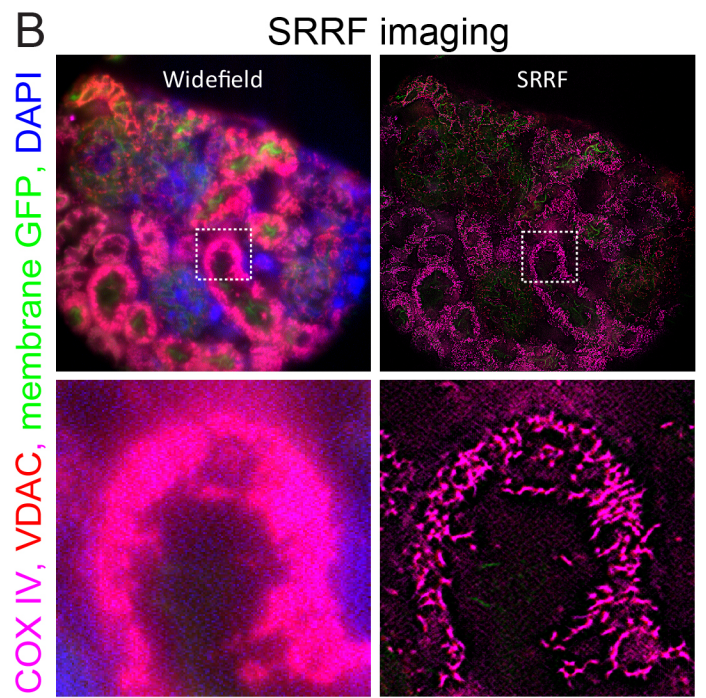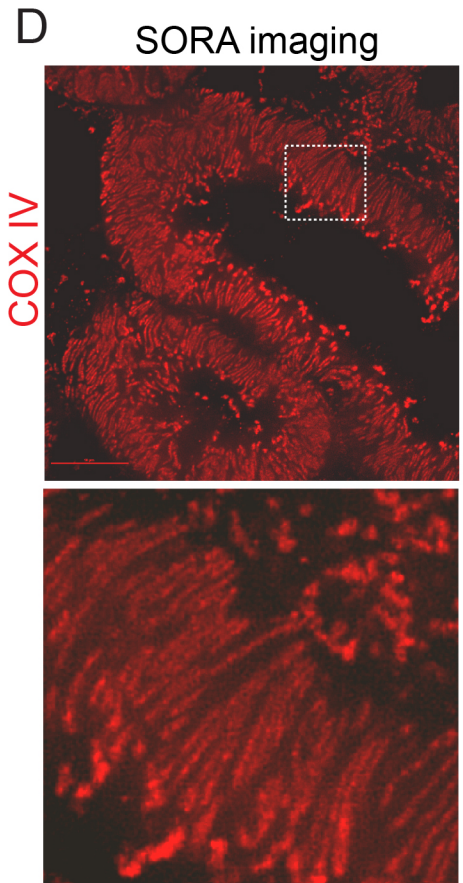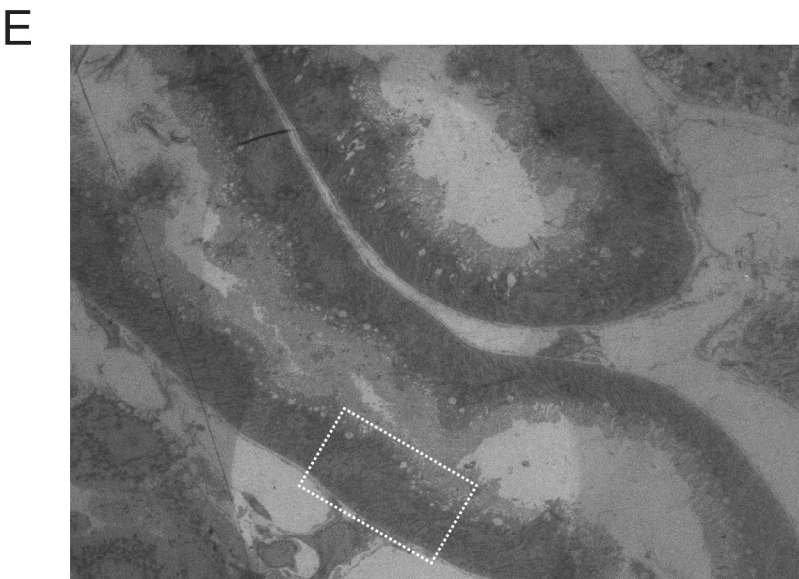

|                                                     | Average ± SE |
|-----------------------------------------------------|--------------|
| Maximum mitochondria network (μm <sup>3</sup> )     | 70.2 ± 2.86  |
| Total mitochondria vol. / tubule (μm <sup>3</sup> ) | 67.1 ± 2.43  |
| Mitochondrial number / tubule (n)                   | 92.8 ± 7.53  |

# Supplemental Figure 2

## A Cardiomyocyte mitochondria

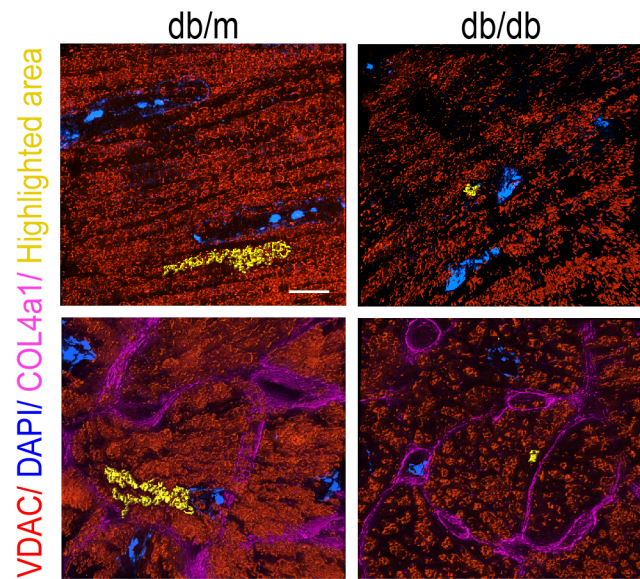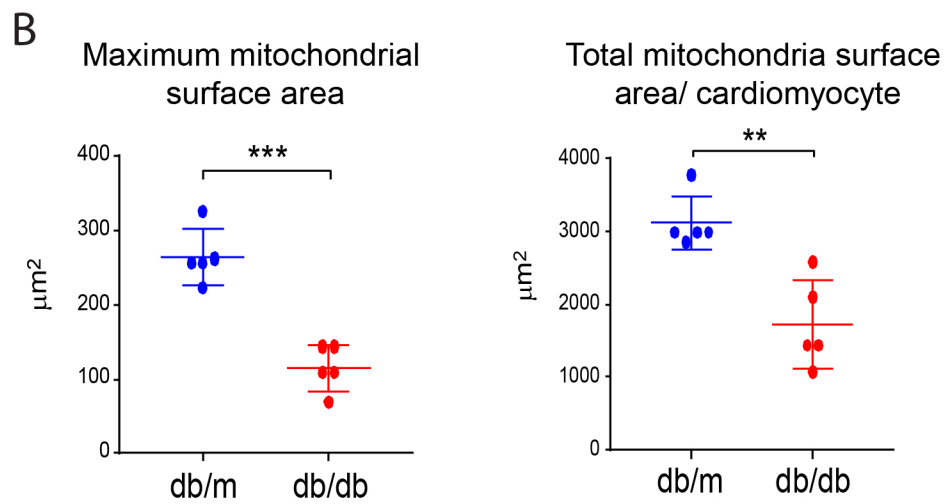

Supplemental Table1

|                             | Reason for Biopsy    | BUN<br>(mg/dL) | Cr<br>(mg/dL) | Proteinuria<br>(g/ g/gCr) | Pathological diagnosis           |
|-----------------------------|----------------------|----------------|---------------|---------------------------|----------------------------------|
| Tubular injury patient #1   | Acute pyelonephritis | 8              | 0.46          | 5.4                       | Diffuse acute tubular injury     |
| Tubular injury patient #2   | Kidney transplant    | 26             | 1.9           | 0.22                      | Multifocal acute tubular injury  |
| Tubular injury patient #3   | Kidney transplant    | 61             | 13.6          | 1.5                       | Diffuse acute tubular injury     |
| Uninjured tubule patient #1 | Kidney transplant    | 25             | 1.06          | 0.14                      | Minimal histologic abnormalities |
| Uninjured tubule patient #2 | Kidney transplant    | 21             | 2.5           | 0.96                      | Minimal histologic abnormalities |
| Uninjured tubule patient #3 | IgA-N                | N/A            | N/A           | 0.3                       | Minimal histologic abnormalities |

Supplemental Table1

Characteristics and diagnosis of patients with or without tubular injury. AKI, acute kidney injury; IgA-N, IgA nephropathy; BUN, blood urea nitrogen; Cr, creatinine; N/A, not available.
